# Supplementary material for: Programmable micrometer-sized motor array based on live cells
Source: Royal Society of Chemistry journal article supplement (doi:10.1039/c7lc00017k), 2017-01-01
Supplement: c7lc00017k4.pdf [file c7lc00017k4.pdf]

**The caption of Code:**

Code. MATLAB source code for trajectory tracing.

**The caption of Cells Releasing:**

Cells Releasing. Trajectory analyses of *C. reinhardtii* cells after being released.

**The caption of Movie S1:**

Movie S1. Trapping and transportation of swimming algal cells.

**The caption of Movie S2:**

Movie S2. Pattern of swimming algal cells.

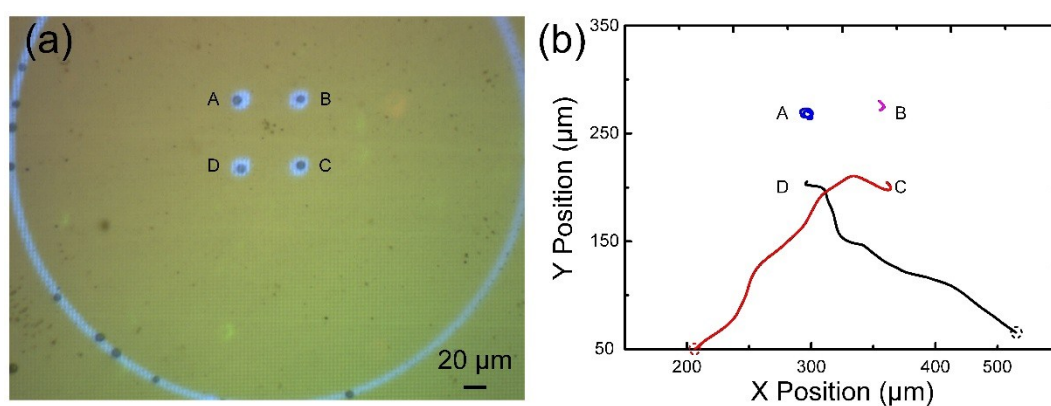

**Fig. S1** (a) Four *C. reinhardtii* cells were trapped. (b) Trajectory analyses of *C. reinhardtii* cells after being released.
